# Supplementary material for: Cumulus Cell Transcriptome after Cumulus-Oocyte Complex Exposure to Nanomolar Cadmium in an In Vitro Animal Model of Prepubertal and Adult Age
Source: Biology (Basel). 2023 Feb 4;12(2):249. doi: 10.3390/biology12020249 (PMC9953098; doi:10.3390/biology12020249)
Supplement: Supplementary file 1 [file biology-12-00249-s001.zip]

Archive with 4 entries (4 files):
- Table S1 - Martino R1.pdf
- Table S2 - Martino R2.pdf
- Table S3 - Martino R3.pdf
- Table S4 - Martino.xlsm
