# Supplementary material for: Cumulus Cell Transcriptome after Cumulus-Oocyte Complex Exposure to Nanomolar Cadmium in an In Vitro Animal Model of Prepubertal and Adult Age
Source: Biology (Basel). 2023 Feb 4;12(2):249. doi: 10.3390/biology12020249 (PMC9953098; doi:10.3390/biology12020249)
Supplement: Supplementary file 1 [file biology-12-00249-s001.zip › Table S4 - Martino.xlsm]

## Sheet: ADULT - GENES
Symbol	Description	Score	Functions	Links
MT1A		0.9758603257214786	cellular response to inorganic substance, cellular response to metal ion, cellular transition metal ion homeostasis, detoxification, detoxification of inorganic compound, response to cadmium ion, response to copper ion, response to metal ion, response to toxic substance, response to zinc ion, stress response to copper ion, stress response to metal ion, transition metal ion homeostasis, zinc ion h…	http://www.ncbi.nlm.nih.gov/sites/entrez?db=gene&cmd=search&term=4489
IHH		0.9516079891594647	embryonic organ development, heart development, leukocyte cell-cell adhesion, leukocyte proliferation, lymphocyte proliferation, mononuclear cell proliferation, positive regulation of cell activation, positive regulation of cell adhesion, positive regulation of cell-cell adhesion, positive regulation of hemopoiesis, positive regulation of leukocyte activation, positive regulation of leukocyte cel…	http://www.ncbi.nlm.nih.gov/sites/entrez?db=gene&cmd=search&term=3549
CYP19A1		0.9263031047630329	androgen metabolic process, cellular hormone metabolic process, estrogen metabolic process, hormone biosynthetic process, hormone metabolic process, lipid export from cell, monooxygenase activity, steroid biosynthetic process, steroid hormone biosynthetic process, steroid metabolic process, tetrapyrrole binding	http://www.ncbi.nlm.nih.gov/sites/entrez?db=gene&cmd=search&term=1588
IGFBP2		0.9198860364855661	activated T cell proliferation, insulin-like growth factor receptor signaling pathway, leukocyte cell-cell adhesion, leukocyte proliferation, lymphocyte proliferation, mononuclear cell proliferation, positive regulation of cell activation, positive regulation of cell adhesion, positive regulation of cell-cell adhesion, positive regulation of leukocyte activation, positive regulation of leukocyte …	http://www.ncbi.nlm.nih.gov/sites/entrez?db=gene&cmd=search&term=3485
NOS2		0.9110722135138133	lipid export from cell, monooxygenase activity, nucleoside phosphate biosynthetic process, nucleotide biosynthetic process, positive regulation of small molecule metabolic process, purine nucleotide biosynthetic process, purine-containing compound biosynthetic process, tetrapyrrole binding	http://www.ncbi.nlm.nih.gov/sites/entrez?db=gene&cmd=search&term=4843
HSD17B1		0.007286033106609968	cellular hormone metabolic process, estrogen metabolic process, hormone biosynthetic process, hormone metabolic process, steroid biosynthetic process, steroid hormone biosynthetic process, steroid metabolic process	http://www.ncbi.nlm.nih.gov/sites/entrez?db=gene&cmd=search&term=3292
DHH		0.0043737590228036805		http://www.ncbi.nlm.nih.gov/sites/entrez?db=gene&cmd=search&term=50846
SHH		0.003711239671018385	cellular hormone metabolic process, embryonic organ development, heart development, hormone metabolic process, leukocyte cell-cell adhesion, leukocyte proliferation, lymphocyte proliferation, mononuclear cell proliferation, muscle cell differentiation, positive regulation of cell activation, positive regulation of cell adhesion, positive regulation of cell-cell adhesion, positive regulation of he…	http://www.ncbi.nlm.nih.gov/sites/entrez?db=gene&cmd=search&term=6469
IGF2		0.003709649094025824	activated T cell proliferation, embryonic organ development, leukocyte cell-cell adhesion, leukocyte proliferation, lymphocyte proliferation, mononuclear cell proliferation, muscle cell differentiation, platelet alpha granule, polysaccharide biosynthetic process, polysaccharide metabolic process, positive regulation of cell activation, positive regulation of cell adhesion, positive regulation of …	http://www.ncbi.nlm.nih.gov/sites/entrez?db=gene&cmd=search&term=3481
IGF1		0.003349063181617651	activated T cell proliferation, heart development, insulin-like growth factor receptor signaling pathway, leukocyte cell-cell adhesion, leukocyte proliferation, lymphocyte proliferation, mononuclear cell proliferation, muscle cell differentiation, platelet alpha granule, polysaccharide biosynthetic process, polysaccharide metabolic process, positive regulation of cell activation, positive regulat…	http://www.ncbi.nlm.nih.gov/sites/entrez?db=gene&cmd=search&term=3479
CYP17A1		0.002829657045028633	androgen metabolic process, cellular hormone metabolic process, hormone biosynthetic process, hormone metabolic process, monooxygenase activity, steroid biosynthetic process, steroid hormone biosynthetic process, steroid metabolic process, tetrapyrrole binding	http://www.ncbi.nlm.nih.gov/sites/entrez?db=gene&cmd=search&term=1586
GUCY1A2		0.00252666886242664		http://www.ncbi.nlm.nih.gov/sites/entrez?db=gene&cmd=search&term=2977
GUCY1A1		0.0024376807339571704	cGMP metabolic process, cyclase activity, cyclic nucleotide biosynthetic process, cyclic purine nucleotide metabolic process, nucleoside phosphate biosynthetic process, nucleotide biosynthetic process, phosphorus-oxygen lyase activity, purine nucleotide biosynthetic process, purine-containing compound biosynthetic process	http://www.ncbi.nlm.nih.gov/sites/entrez?db=gene&cmd=search&term=2982
HHIP		0.0023761586997033124	regulation of smoothened signaling pathway, smoothened signaling pathway	http://www.ncbi.nlm.nih.gov/sites/entrez?db=gene&cmd=search&term=64399
GUCY1B1		0.002365368041895133	cellular response to inorganic substance, cGMP metabolic process, cyclase activity, cyclic nucleotide biosynthetic process, cyclic purine nucleotide metabolic process, nucleoside phosphate biosynthetic process, nucleotide biosynthetic process, phosphorus-oxygen lyase activity, purine nucleotide biosynthetic process, purine-containing compound biosynthetic process, tetrapyrrole binding	http://www.ncbi.nlm.nih.gov/sites/entrez?db=gene&cmd=search&term=2983
PTCH2		0.0019738934077541126	regulation of smoothened signaling pathway, smoothened signaling pathway	http://www.ncbi.nlm.nih.gov/sites/entrez?db=gene&cmd=search&term=8643
HSD17B3		0.0015481023047369535	androgen metabolic process, cellular hormone metabolic process, hormone biosynthetic process, hormone metabolic process, steroid biosynthetic process, steroid hormone biosynthetic process, steroid metabolic process	http://www.ncbi.nlm.nih.gov/sites/entrez?db=gene&cmd=search&term=3293
GAS1		0.0015382555468143044	smoothened signaling pathway	http://www.ncbi.nlm.nih.gov/sites/entrez?db=gene&cmd=search&term=2619
MT1H		0.0015052630125116928	cellular response to inorganic substance, cellular response to metal ion, cellular transition metal ion homeostasis, detoxification, detoxification of inorganic compound, response to cadmium ion, response to copper ion, response to metal ion, response to toxic substance, response to zinc ion, stress response to copper ion, stress response to metal ion, transition metal ion homeostasis, zinc ion h…	http://www.ncbi.nlm.nih.gov/sites/entrez?db=gene&cmd=search&term=4496
MT1B		0.0015043882379083828	cellular response to inorganic substance, cellular response to metal ion, cellular transition metal ion homeostasis, detoxification, detoxification of inorganic compound, response to cadmium ion, response to copper ion, response to metal ion, response to toxic substance, response to zinc ion, stress response to copper ion, stress response to metal ion, transition metal ion homeostasis, zinc ion h…	http://www.ncbi.nlm.nih.gov/sites/entrez?db=gene&cmd=search&term=4490
TGFB1		0.0014859745264905189	embryonic organ development, heart development, muscle cell differentiation, nucleoside phosphate biosynthetic process, nucleotide biosynthetic process, platelet alpha granule, polysaccharide biosynthetic process, polysaccharide metabolic process, positive regulation of cell activation, positive regulation of hemopoiesis, positive regulation of leukocyte activation, positive regulation of leukocy…	http://www.ncbi.nlm.nih.gov/sites/entrez?db=gene&cmd=search&term=7040
UCHL5		0.0014519855264505388	regulation of smoothened signaling pathway, smoothened signaling pathway	http://www.ncbi.nlm.nih.gov/sites/entrez?db=gene&cmd=search&term=51377
MT1E		0.0014358516206303684	cellular response to inorganic substance, cellular response to metal ion, cellular transition metal ion homeostasis, detoxification, detoxification of inorganic compound, response to cadmium ion, response to copper ion, response to metal ion, response to toxic substance, response to zinc ion, stress response to copper ion, stress response to metal ion, transition metal ion homeostasis, zinc ion h…	http://www.ncbi.nlm.nih.gov/sites/entrez?db=gene&cmd=search&term=4493
ACTN4		0.0014304099432508877	platelet alpha granule, secretory granule lumen	http://www.ncbi.nlm.nih.gov/sites/entrez?db=gene&cmd=search&term=81
MT1G		0.0014262124846576851	cellular response to inorganic substance, cellular response to metal ion, cellular transition metal ion homeostasis, detoxification, detoxification of inorganic compound, response to cadmium ion, response to copper ion, response to metal ion, response to toxic substance, response to zinc ion, stress response to copper ion, stress response to metal ion, transition metal ion homeostasis, zinc ion h…	http://www.ncbi.nlm.nih.gov/sites/entrez?db=gene&cmd=search&term=4495

## Sheet: ADULT - FUNCTIONS
Function	FDR	Genes in network	Genes in genome
detoxification of inorganic compound	2.80315e+08	5	14
stress response to copper ion	2.80315e+08	5	14
stress response to metal ion	2.80315e+08	5	14
response to zinc ion	8.9671e+07	5	18
response to copper ion	1.69943e+09	5	21
smoothened signaling pathway	2.23129e+09	6	56
response to cadmium ion	4.79137e+08	5	27
zinc ion homeostasis	0.0000014364908786778958	5	34
regulation of smoothened signaling pathway	0.000004383692896373819	5	43
detoxification	0.000008632649360652572	5	50
response to toxic substance	0.000011674271279002458	5	54
cellular response to inorganic substance	0.000037100710419889366	6	145
positive regulation of T cell proliferation	0.00017506014217160727	4	36
cellular hormone metabolic process	0.00023194983604988645	5	102
cellular transition metal ion homeostasis	0.00025033670571835315	5	105
transition metal ion homeostasis	0.00031474857220287075	5	114
steroid hormone biosynthetic process	0.00031474857220287075	4	44
positive regulation of lymphocyte activation	0.00031474857220287075	6	221
regulation of T cell proliferation	0.0003693978758579004	5	119
androgen metabolic process	0.00047670991365018705	3	13
T cell proliferation	0.00047670991365018705	5	129
cellular response to metal ion	0.00047670991365018705	5	129
hormone biosynthetic process	0.0005231317334950898	4	54
positive regulation of leukocyte activation	0.0005486231321663398	6	257
positive regulation of cell activation	0.0006026950685778526	6	263
regulation of lymphocyte proliferation	0.0012217479157556515	5	163
regulation of mononuclear cell proliferation	0.0012217479157556515	5	165
positive regulation of T cell activation	0.0012217479157556515	5	162
hormone metabolic process	0.0012217479157556515	5	165
regulation of leukocyte proliferation	0.0017143573132715102	5	178
positive regulation of leukocyte cell-cell adhesion	0.002112726639011825	5	187
platelet alpha granule	0.0021313887978991444	4	83
lymphocyte proliferation	0.002547397690812122	5	198
response to metal ion	0.002547397690812122	5	197
mononuclear cell proliferation	0.0027283724600813746	5	202
regulation of muscle cell differentiation	0.0029846302759837916	4	93
tetrapyrrole binding	0.003394006362884021	4	98
positive regulation of lymphocyte proliferation	0.003394006362884021	4	98
positive regulation of cell-cell adhesion	0.003394006362884021	5	216
leukocyte proliferation	0.0036397463679450808	5	221
positive regulation of mononuclear cell proliferation	0.0036397463679450808	4	101
regulation of activated T cell proliferation	0.0037168393189611175	3	31
regulation of polysaccharide biosynthetic process	0.004002606153059951	3	32
positive regulation of muscle cell differentiation	0.004506464161824762	3	34
positive regulation of leukocyte proliferation	0.004506464161824762	4	109
activated T cell proliferation	0.004506464161824762	3	34
steroid metabolic process	0.00498531535205541	5	243
regulation of polysaccharide metabolic process	0.005144364074127048	3	36
regulation of T cell activation	0.005700178423846459	5	252
regulation of leukocyte cell-cell adhesion	0.005803354785239527	5	254
leukocyte cell-cell adhesion	0.008194793922355913	5	274
positive regulation of cell adhesion	0.012212630318769208	5	299
purine nucleotide biosynthetic process	0.012713592575125212	4	148
steroid biosynthetic process	0.015717713635479507	4	157
purine-containing compound biosynthetic process	0.020094714071412615	4	168
estrogen metabolic process	0.02431984668470982	2	10
regulation of carbohydrate biosynthetic process	0.027075531656001742	3	66
polysaccharide biosynthetic process	0.02987478451082473	3	69
embryonic organ development	0.02987478451082473	4	189
cGMP metabolic process	0.032694484957164933	2	12
regulation of T cell differentiation in thymus	0.032694484957164933	2	12
nucleotide biosynthetic process	0.03572225574427836	4	201
muscle cell differentiation	0.040862525723976424	4	209
nucleoside phosphate biosynthetic process	0.04172612272429959	4	211
secretory granule lumen	0.048343544004875505	4	221
positive regulation of glycogen metabolic process	0.048343544004875505	2	15
monooxygenase activity	0.04893390719305375	3	85
polysaccharide metabolic process	0.057108087244627785	3	90
phosphorus-oxygen lyase activity	0.06669225237389095	2	18
heart development	0.07312114569238755	4	251
insulin-like growth factor receptor signaling pathway	0.07312114569238755	2	19
positive regulation of small molecule metabolic process	0.07814384397880224	3	103
cyclic purine nucleotide metabolic process	0.07814384397880224	2	20
regulation of glycogen biosynthetic process	0.07814384397880224	2	20
positive regulation of glucose metabolic process	0.08183671908048362	2	21
cyclase activity	0.08183671908048362	2	21
cyclic nucleotide biosynthetic process	0.08183671908048362	2	21
positive regulation of hemopoiesis	0.08187783700460004	3	107
positive regulation of leukocyte differentiation	0.08187783700460004	3	107
lipid export from cell	0.08657726695114451	2	22
regulation of muscle organ development	0.09357926732216383	2	23

## Sheet: ADULT - INTERACTIONS
Gene 1	Gene 2	Weight	Network group (from GeneMANIA Application version : 3.6.0)
GUCY1B1	GUCY1A1	0.018604424	Co-expression
GAS1	IGF1	0.024628622	Co-expression
MT1H	GAS1	0.014871646	Co-expression
MT1B	MT1H	0.01676243	Co-expression
MT1E	MT1H	0.014661675	Co-expression
MT1E	MT1B	0.013289453	Co-expression
ACTN4	GUCY1A1	0.013733947	Co-expression
HSD17B3	CYP17A1	0.0076366942	Co-expression
GAS1	NOS2	0.013187065	Co-expression
GAS1	GUCY1B1	0.011120955	Co-expression
MT1H	MT1A	0.02854192	Co-expression
MT1B	MT1A	0.030345531	Co-expression
MT1B	MT1H	0.030596266	Co-expression
MT1E	MT1A	0.024509465	Co-expression
MT1E	MT1H	0.024696998	Co-expression
MT1E	MT1B	0.027364388	Co-expression
MT1G	MT1A	0.02734715	Co-expression
MT1G	MT1H	0.027623208	Co-expression
MT1G	MT1B	0.029727418	Co-expression
MT1G	MT1E	0.02528839	Co-expression
IGF1	IHH	0.016162472	Co-expression
GUCY1B1	GUCY1A2	0.025485393	Co-expression
MT1E	MT1H	0.03969292	Co-expression
MT1G	MT1H	0.033094164	Co-expression
MT1G	MT1E	0.030337935	Co-expression
DHH	CYP19A1	0.016083376	Co-expression
CYP17A1	CYP19A1	0.0073242835	Co-expression
MT1E	MT1H	0.019404009	Co-expression
MT1G	MT1H	0.017628597	Co-expression
MT1G	MT1E	0.01825587	Co-expression
DHH	HSD17B1	0.0074332934	Co-expression
GUCY1B1	GUCY1A1	0.0143979695	Co-expression
MT1H	MT1A	0.041993946	Co-expression
MT1B	MT1A	0.0403243	Co-expression
MT1B	MT1H	0.03874453	Co-expression
MT1E	MT1A	0.037637472	Co-expression
MT1E	MT1H	0.03601154	Co-expression
MT1E	MT1B	0.034275576	Co-expression
MT1G	MT1A	0.044722307	Co-expression
MT1G	MT1H	0.04319725	Co-expression
MT1G	MT1B	0.0425434	Co-expression
MT1G	MT1E	0.038906656	Co-expression
GUCY1B1	GUCY1A1	0.0064973575	Co-expression
HSD17B3	NOS2	0.01574677	Co-expression
MT1E	MT1H	0.02287721	Co-expression
MT1G	MT1H	0.018524228	Co-expression
MT1G	MT1E	0.017207023	Co-expression
IGF2	CYP19A1	0.011365436	Co-expression
IGF2	DHH	0.009340938	Co-expression
GUCY1B1	GUCY1A1	0.0101309875	Co-expression
MT1H	MT1A	0.020366186	Co-expression
MT1H	GUCY1B1	0.0063448995	Co-expression
MT1B	MT1A	0.016800882	Co-expression
MT1B	MT1H	0.01718263	Co-expression
MT1E	MT1A	0.024888013	Co-expression
MT1E	GUCY1B1	0.006608302	Co-expression
MT1E	MT1H	0.023312824	Co-expression
MT1E	MT1B	0.02108932	Co-expression
ACTN4	TGFB1	0.0154666	Co-expression
MT1G	MT1A	0.01767568	Co-expression
MT1G	MT1H	0.017194929	Co-expression
MT1G	MT1B	0.016318081	Co-expression
MT1G	MT1E	0.017844427	Co-expression
IGF1	IGF2	0.0073439362	Co-expression
GUCY1B1	GUCY1A1	0.027979616	Co-expression
MT1H	MT1A	0.05531992	Co-expression
MT1B	MT1A	0.056323703	Co-expression
MT1B	MT1H	0.059579775	Co-expression
MT1E	MT1A	0.05559596	Co-expression
MT1E	MT1H	0.053694382	Co-expression
MT1E	MT1B	0.060463022	Co-expression
MT1G	MT1A	0.040487267	Co-expression
MT1G	MT1H	0.05089238	Co-expression
MT1G	MT1B	0.041396223	Co-expression
MT1G	MT1E	0.034575682	Co-expression
GUCY1B1	IGFBP2	0.02201407	Co-expression
MT1H	MT1A	0.04789967	Co-expression
MT1B	MT1A	0.036404643	Co-expression
MT1B	MT1H	0.037735768	Co-expression
MT1E	MT1A	0.03222999	Co-expression
MT1E	MT1H	0.03479092	Co-expression
MT1E	MT1B	0.028594708	Co-expression
MT1G	MT1A	0.050590478	Co-expression
MT1G	MT1H	0.04878821	Co-expression
MT1G	MT1B	0.03082561	Co-expression
MT1G	MT1E	0.030651558	Co-expression
IGF1	CYP19A1	0.010827091	Co-expression
GUCY1B1	GUCY1A1	0.0034334466	Co-expression
GAS1	GUCY1A1	0.008914997	Co-expression
MT1E	MT1H	0.028021917	Co-expression
MT1G	MT1H	0.03095279	Co-expression
MT1G	MT1E	0.03723422	Co-expression
SHH	DHH	0.013058675	Co-expression
MT1H	MT1A	0.03577203	Co-expression
MT1B	MT1A	0.03655908	Co-expression
MT1B	MT1H	0.035889905	Co-expression
MT1E	MT1A	0.031716578	Co-expression
MT1E	MT1H	0.030747108	Co-expression
MT1E	MT1B	0.031579316	Co-expression
MT1G	MT1A	0.036319733	Co-expression
MT1G	MT1H	0.035464518	Co-expression
MT1G	MT1B	0.035927553	Co-expression
MT1G	MT1E	0.031178584	Co-expression
IGF1	IGF2	0.005582899	Co-expression
MT1G	MT1H	0.039793033	Co-expression
GUCY1A1	DHH	0.019075679	Co-expression
GAS1	GUCY1A1	0.010085654	Co-expression
MT1H	IGF1	0.0080103865	Co-expression
MT1G	IGF1	0.008184725	Co-expression
MT1G	MT1H	0.008814949	Co-expression
GUCY1A2	NOS2	0.009019545	Co-expression
GUCY1B1	HSD17B1	0.010777333	Co-expression
GUCY1B1	GUCY1A1	0.009875859	Co-expression
MT1E	MT1H	0.024098871	Co-expression
ACTN4	TGFB1	0.0043168277	Co-expression
MT1G	MT1H	0.021361921	Co-expression
MT1G	MT1E	0.029573139	Co-expression
DHH	NOS2	0.006305236	Co-expression
DHH	HSD17B1	0.0069486066	Co-expression
IGF2	IGFBP2	0.010594033	Co-expression
CYP17A1	DHH	0.0063049323	Co-expression
MT1H	MT1A	0.02127589	Co-expression
MT1B	MT1A	0.0172949	Co-expression
MT1B	MT1H	0.0188692	Co-expression
MT1E	MT1A	0.020073097	Co-expression
MT1E	MT1H	0.021940881	Co-expression
MT1E	MT1B	0.020246256	Co-expression
MT1G	IGFBP2	0.0070178537	Co-expression
MT1G	DHH	0.0012949784	Co-expression
IGF1	CYP19A1	0.005100217	Co-expression
MT1G	MT1H	0.015642602	Co-expression
MT1G	GAS1	0.013885761	Co-expression
GUCY1B1	GUCY1A1	0.015904382	Co-localization
HSD17B1	CYP19A1	0.00909151	Co-localization
GUCY1B1	GUCY1A2	0.011600778	Co-localization
MT1G	MT1H	0.010700333	Co-localization
TGFB1	NOS2	0.8426755	Genetic Interactions
IGFBP2	CYP19A1	0.00063155213	Genetic Interactions
IGF1	IGFBP2	0.0019707948	Genetic Interactions
CYP17A1	CYP19A1	0.00038074216	Genetic Interactions
HHIP	CYP19A1	0.00023857447	Genetic Interactions
HHIP	SHH	0.0007639674	Genetic Interactions
HHIP	GUCY1A2	0.00040604125	Genetic Interactions
GUCY1B1	CYP19A1	0.00064520485	Genetic Interactions
HSD17B3	IHH	0.0017867453	Genetic Interactions
HSD17B3	HHIP	0.00080799515	Genetic Interactions
UCHL5	CYP19A1	0.00058868073	Genetic Interactions
UCHL5	DHH	0.0023967952	Genetic Interactions
UCHL5	MT1B	0.0055496898	Genetic Interactions
ACTN4	CYP19A1	0.0003292842	Genetic Interactions
ACTN4	HSD17B1	0.00090597896	Genetic Interactions
ACTN4	GUCY1A2	0.00056042447	Genetic Interactions
MT1G	ACTN4	0.0011863266	Genetic Interactions
IGF2	IGFBP2	0.16222265	Pathway
IGF1	IGFBP2	0.18401	Pathway
GUCY1A2	NOS2	0.13461156	Pathway
GUCY1A1	NOS2	0.13461156	Pathway
HHIP	IHH	0.21237203	Pathway
HHIP	DHH	0.23779507	Pathway
HHIP	SHH	0.11087417	Pathway
GUCY1B1	NOS2	0.12248501	Pathway
PTCH2	IHH	0.1890345	Pathway
PTCH2	DHH	0.21166381	Pathway
PTCH2	SHH	0.098690234	Pathway
GAS1	IHH	0.27215677	Pathway
GAS1	DHH	0.30473667	Pathway
GAS1	SHH	0.14208631	Pathway
HHIP	IHH	0.2652117	Pathway
HHIP	DHH	0.42292508	Pathway
HHIP	SHH	0.118011534	Pathway
PTCH2	IHH	0.2652117	Pathway
PTCH2	DHH	0.42292508	Pathway
PTCH2	SHH	0.118011534	Pathway
GAS1	SHH	0.20185104	Pathway
HSD17B1	CYP19A1	0.7530425	Physical Interactions
IGF2	IGFBP2	0.21486741	Physical Interactions
IGF1	IGFBP2	0.21197517	Physical Interactions
CYP17A1	CYP19A1	0.28766167	Physical Interactions
GUCY1A2	NOS2	0.19227748	Physical Interactions
GUCY1A1	NOS2	0.19227748	Physical Interactions
GUCY1B1	NOS2	0.18458456	Physical Interactions
GUCY1B1	GUCY1A2	0.04711277	Physical Interactions
GUCY1B1	GUCY1A1	0.04711277	Physical Interactions
HSD17B3	CYP19A1	0.15899274	Physical Interactions
HSD17B3	CYP17A1	0.13969503	Physical Interactions
UCHL5	TGFB1	0.05595314	Physical Interactions
HSD17B1	CYP19A1	0.7530425	Physical Interactions
IGF2	IGFBP2	0.21486741	Physical Interactions
IGF1	IGFBP2	0.21197517	Physical Interactions
CYP17A1	CYP19A1	0.28766167	Physical Interactions
GUCY1A2	NOS2	0.19227748	Physical Interactions
GUCY1A1	NOS2	0.19227748	Physical Interactions
GUCY1B1	NOS2	0.18458456	Physical Interactions
GUCY1B1	GUCY1A2	0.04711277	Physical Interactions
GUCY1B1	GUCY1A1	0.04711277	Physical Interactions
HSD17B3	CYP19A1	0.15899274	Physical Interactions
HSD17B3	CYP17A1	0.13969503	Physical Interactions
UCHL5	TGFB1	0.05595314	Physical Interactions
HHIP	DHH	0.76536685	Physical Interactions
HHIP	SHH	0.49258572	Physical Interactions
HHIP	DHH	1	Physical Interactions
UCHL5	NOS2	0.79790634	Physical Interactions
GUCY1B1	GUCY1A1	1	Physical Interactions
IGF1	IGFBP2	0.22561884	Physical Interactions
GUCY1B1	GUCY1A2	0.3598631	Physical Interactions
UCHL5	NOS2	0.01192401	Physical Interactions
ACTN4	UCHL5	0.0050416472	Physical Interactions
GUCY1B1	GUCY1A2	0.46754232	Physical Interactions
GUCY1B1	GUCY1A1	0.28426316	Physical Interactions
IGF2	IGFBP2	1	Physical Interactions
GUCY1B1	GUCY1A2	0.70710677	Physical Interactions
GUCY1B1	GUCY1A1	0.70710677	Physical Interactions
IGF2	IGFBP2	0.30660617	Physical Interactions
IGF1	IGFBP2	0.28710374	Physical Interactions
HHIP	DHH	0.39948943	Physical Interactions
HHIP	SHH	0.47752362	Physical Interactions
TGFB1	NOS2	0.22775964	Physical Interactions
GUCY1B1	GUCY1A2	0.23392197	Physical Interactions
GUCY1B1	GUCY1A1	0.22294427	Physical Interactions
DHH	IHH	0.76536685	Predicted
SHH	IHH	0.49258572	Predicted
IGF1	IGF2	0.28331524	Predicted
GUCY1B1	GUCY1A2	1	Predicted
MT1E	MT1H	0.18305619	Predicted
ACTN4	NOS2	0.22528246	Predicted
MT1G	MT1H	0.15586922	Predicted
MT1G	MT1E	0.18305619	Predicted
ACTN4	NOS2	0.3221917	Predicted
HHIP	SHH	0.49208543	Predicted
GAS1	SHH	0.49208543	Predicted
ACTN4	NOS2	0.2761051	Predicted
HHIP	IHH	0.60778123	Predicted
HHIP	DHH	0.60778123	Predicted
HHIP	SHH	0.30920425	Predicted
ACTN4	NOS2	1	Predicted
DHH	IHH	0.4863845	Shared protein domains
SHH	IHH	0.5268602	Shared protein domains
SHH	DHH	0.4863845	Shared protein domains
IGF1	IGF2	0.16123322	Shared protein domains
CYP17A1	CYP19A1	0.017503425	Shared protein domains
GUCY1A1	GUCY1A2	0.1013355	Shared protein domains
GUCY1B1	GUCY1A2	0.1013355	Shared protein domains
GUCY1B1	GUCY1A1	0.1013355	Shared protein domains
HSD17B3	HSD17B1	0.021070212	Shared protein domains
MT1H	MT1A	0.09516847	Shared protein domains
MT1B	MT1A	0.09516847	Shared protein domains
MT1B	MT1H	0.09516847	Shared protein domains
MT1E	MT1A	0.09516847	Shared protein domains
MT1E	MT1H	0.09516847	Shared protein domains
MT1E	MT1B	0.09516847	Shared protein domains
MT1G	MT1A	0.09516847	Shared protein domains
MT1G	MT1H	0.09516847	Shared protein domains
MT1G	MT1B	0.09516847	Shared protein domains
MT1G	MT1E	0.09516847	Shared protein domains
DHH	IHH	0.5	Shared protein domains
SHH	IHH	0.5	Shared protein domains
SHH	DHH	0.5	Shared protein domains
IGF1	IGF2	0.11111088	Shared protein domains
CYP17A1	CYP19A1	0.016431281	Shared protein domains
GUCY1A1	GUCY1A2	0.16831563	Shared protein domains
GUCY1B1	GUCY1A2	0.16831563	Shared protein domains
GUCY1B1	GUCY1A1	0.16831563	Shared protein domains
HSD17B3	HSD17B1	0.019407237	Shared protein domains
MT1H	MT1A	0.09090909	Shared protein domains
MT1B	MT1A	0.09090909	Shared protein domains
MT1B	MT1H	0.09090909	Shared protein domains
MT1E	MT1A	0.09090909	Shared protein domains
MT1E	MT1H	0.09090909	Shared protein domains
MT1E	MT1B	0.09090909	Shared protein domains
MT1G	MT1A	0.09090909	Shared protein domains
MT1G	MT1H	0.09090909	Shared protein domains
MT1G	MT1B	0.09090909	Shared protein domains
MT1G	MT1E	0.09090909	Shared protein domains

## Sheet: PREPUBERTAL - GENES
Symbol	Description	Score	Functions	Links
MT1A		0.9758605096854527	cellular response to inorganic substance, cellular response to metal ion, cellular transition metal ion homeostasis, detoxification, detoxification of inorganic compound, response to cadmium ion, response to copper ion, response to metal ion, response to toxic substance, response to zinc ion, stress response to copper ion, stress response to metal ion, transition metal ion homeostasis, zinc ion h…	http://www.ncbi.nlm.nih.gov/sites/entrez?db=gene&cmd=search&term=4489
SLC30A2		0.971583307247187	cellular transition metal ion homeostasis, divalent inorganic cation transmembrane transporter activity, response to metal ion, sequestering of metal ion, transition metal ion homeostasis, transition metal ion transmembrane transporter activity, transition metal ion transport, zinc ion homeostasis, zinc ion transport	http://www.ncbi.nlm.nih.gov/sites/entrez?db=gene&cmd=search&term=7780
BMP15		0.9486541815563994	regulation of transmembrane receptor protein serine/threonine kinase signaling pathway, transmembrane receptor protein serine/threonine kinase signaling pathway	http://www.ncbi.nlm.nih.gov/sites/entrez?db=gene&cmd=search&term=9210
HSPA6		0.9253202418097849	'de novo' posttranslational protein folding, 'de novo' protein folding, cellular response to heat, cellular response to topologically incorrect protein, chaperone-mediated protein folding, ficolin-1-rich granule, protein folding, response to heat, response to temperature stimulus, response to topologically incorrect protein	http://www.ncbi.nlm.nih.gov/sites/entrez?db=gene&cmd=search&term=3310
DSG2		0.9162278728776965	bundle of His cell to Purkinje myocyte communication	http://www.ncbi.nlm.nih.gov/sites/entrez?db=gene&cmd=search&term=1829
DSC1		0.0020612987304575725	ficolin-1-rich granule	http://www.ncbi.nlm.nih.gov/sites/entrez?db=gene&cmd=search&term=1823
GDF9		0.0019992503607959566	regulation of transmembrane receptor protein serine/threonine kinase signaling pathway, transmembrane receptor protein serine/threonine kinase signaling pathway	http://www.ncbi.nlm.nih.gov/sites/entrez?db=gene&cmd=search&term=2661
MT1H		0.0015052542426489124	cellular response to inorganic substance, cellular response to metal ion, cellular transition metal ion homeostasis, detoxification, detoxification of inorganic compound, response to cadmium ion, response to copper ion, response to metal ion, response to toxic substance, response to zinc ion, stress response to copper ion, stress response to metal ion, transition metal ion homeostasis, zinc ion h…	http://www.ncbi.nlm.nih.gov/sites/entrez?db=gene&cmd=search&term=4496
MT1B		0.0015048913100376704	cellular response to inorganic substance, cellular response to metal ion, cellular transition metal ion homeostasis, detoxification, detoxification of inorganic compound, response to cadmium ion, response to copper ion, response to metal ion, response to toxic substance, response to zinc ion, stress response to copper ion, stress response to metal ion, transition metal ion homeostasis, zinc ion h…	http://www.ncbi.nlm.nih.gov/sites/entrez?db=gene&cmd=search&term=4490
MT1E		0.001502291598339256	cellular response to inorganic substance, cellular response to metal ion, cellular transition metal ion homeostasis, detoxification, detoxification of inorganic compound, response to cadmium ion, response to copper ion, response to metal ion, response to toxic substance, response to zinc ion, stress response to copper ion, stress response to metal ion, transition metal ion homeostasis, zinc ion h…	http://www.ncbi.nlm.nih.gov/sites/entrez?db=gene&cmd=search&term=4493
MT1F		0.0014991715763403302	cellular response to inorganic substance, cellular response to metal ion, cellular transition metal ion homeostasis, detoxification, detoxification of inorganic compound, response to cadmium ion, response to copper ion, response to metal ion, response to toxic substance, response to zinc ion, stress response to copper ion, stress response to metal ion, transition metal ion homeostasis, zinc ion h…	http://www.ncbi.nlm.nih.gov/sites/entrez?db=gene&cmd=search&term=4494
HSPA8		0.0014988759571771815	'de novo' posttranslational protein folding, 'de novo' protein folding, cellular response to heat, cellular response to topologically incorrect protein, chaperone-mediated protein folding, ficolin-1-rich granule, protein folding, response to heat, response to temperature stimulus, response to topologically incorrect protein	http://www.ncbi.nlm.nih.gov/sites/entrez?db=gene&cmd=search&term=3312
MT1G		0.0014971254736397266	cellular response to inorganic substance, cellular response to metal ion, cellular transition metal ion homeostasis, detoxification, detoxification of inorganic compound, response to cadmium ion, response to copper ion, response to metal ion, response to toxic substance, response to zinc ion, stress response to copper ion, stress response to metal ion, transition metal ion homeostasis, zinc ion h…	http://www.ncbi.nlm.nih.gov/sites/entrez?db=gene&cmd=search&term=4495
MT1X		0.0014227117937583578	cellular response to inorganic substance, cellular response to metal ion, cellular transition metal ion homeostasis, detoxification, detoxification of inorganic compound, response to cadmium ion, response to copper ion, response to metal ion, response to toxic substance, response to zinc ion, stress response to copper ion, stress response to metal ion, transition metal ion homeostasis, zinc ion h…	http://www.ncbi.nlm.nih.gov/sites/entrez?db=gene&cmd=search&term=4501
HSPA1A		0.0013704666704612012	'de novo' posttranslational protein folding, 'de novo' protein folding, cellular response to heat, cellular response to topologically incorrect protein, chaperone-mediated protein folding, ficolin-1-rich granule, protein folding, regulation of transmembrane receptor protein serine/threonine kinase signaling pathway, response to heat, response to temperature stimulus, response to topologically inc…	http://www.ncbi.nlm.nih.gov/sites/entrez?db=gene&cmd=search&term=3303
SLC30A3		0.0013636042018879135	cellular transition metal ion homeostasis, divalent inorganic cation transmembrane transporter activity, response to metal ion, sequestering of metal ion, transition metal ion homeostasis, transition metal ion transmembrane transporter activity, transition metal ion transport, zinc ion homeostasis, zinc ion transport	http://www.ncbi.nlm.nih.gov/sites/entrez?db=gene&cmd=search&term=7781
SLC30A10		0.0013005151802542025	cellular response to inorganic substance, cellular response to metal ion, cellular transition metal ion homeostasis, divalent inorganic cation transmembrane transporter activity, response to metal ion, transition metal ion homeostasis, transition metal ion transmembrane transporter activity, transition metal ion transport, zinc ion homeostasis, zinc ion transport	http://www.ncbi.nlm.nih.gov/sites/entrez?db=gene&cmd=search&term=55532
DSC2		0.0012939706229234127	bundle of His cell to Purkinje myocyte communication	http://www.ncbi.nlm.nih.gov/sites/entrez?db=gene&cmd=search&term=1824
XIAP		0.0011882903031176784	regulation of transmembrane receptor protein serine/threonine kinase signaling pathway, transition metal ion homeostasis, transmembrane receptor protein serine/threonine kinase signaling pathway	http://www.ncbi.nlm.nih.gov/sites/entrez?db=gene&cmd=search&term=331
STUB1		0.0011737187115366532	cellular response to topologically incorrect protein, regulation of transmembrane receptor protein serine/threonine kinase signaling pathway, response to heat, response to temperature stimulus, response to topologically incorrect protein, transmembrane receptor protein serine/threonine kinase signaling pathway	http://www.ncbi.nlm.nih.gov/sites/entrez?db=gene&cmd=search&term=10273
DNAJB4		0.0011097376629658484	'de novo' posttranslational protein folding, 'de novo' protein folding, chaperone-mediated protein folding, protein folding, response to temperature stimulus, response to topologically incorrect protein	http://www.ncbi.nlm.nih.gov/sites/entrez?db=gene&cmd=search&term=11080
CASP3		0.0010845615144831622		http://www.ncbi.nlm.nih.gov/sites/entrez?db=gene&cmd=search&term=836
MT2A		0.0010770958001832809	cellular response to inorganic substance, cellular response to metal ion, cellular transition metal ion homeostasis, detoxification, detoxification of inorganic compound, response to cadmium ion, response to copper ion, response to metal ion, response to toxic substance, response to zinc ion, stress response to copper ion, stress response to metal ion, transition metal ion homeostasis, zinc ion h…	http://www.ncbi.nlm.nih.gov/sites/entrez?db=gene&cmd=search&term=4502
SLC30A1		0.001040092451121688	cellular transition metal ion homeostasis, divalent inorganic cation transmembrane transporter activity, transition metal ion homeostasis, transition metal ion transmembrane transporter activity, transition metal ion transport, zinc ion homeostasis, zinc ion transport	http://www.ncbi.nlm.nih.gov/sites/entrez?db=gene&cmd=search&term=7779
APAF1		0.001012839218325401	ficolin-1-rich granule	http://www.ncbi.nlm.nih.gov/sites/entrez?db=gene&cmd=search&term=317

## Sheet: PREPUBERTAL - FUNCTIONS
Function	FDR	Genes in network	Genes in genome
zinc ion homeostasis	7.78392e-09	12	34
transition metal ion homeostasis	0.0019434	13	114
cellular transition metal ion homeostasis	0.00884245	12	105
detoxification of inorganic compound	0.0188743	8	14
stress response to copper ion	0.0188743	8	14
stress response to metal ion	0.0188743	8	14
response to zinc ion	2.35014	8	18
response to copper ion	0.954084	8	21
response to cadmium ion	9.20995	8	27
response to metal ion	585.825	11	197
detoxification	1790.36	8	50
response to toxic substance	3170.8	8	54
cellular response to metal ion	47206.6	9	129
cellular response to inorganic substance	1.28136e+06	9	145
zinc ion transport	0.000012650583171253859	4	20
'de novo' posttranslational protein folding	0.000030833700317117564	4	25
chaperone-mediated protein folding	0.00005912340331225592	4	30
'de novo' protein folding	0.00005912340331225592	4	30
transition metal ion transmembrane transporter activity	0.0001065602230537634	4	35
response to temperature stimulus	0.0009363546921769394	5	145
response to topologically incorrect protein	0.0023823096567617053	5	177
ficolin-1-rich granule	0.002824330131661703	5	185
protein folding	0.0029654105014248968	4	83
regulation of transmembrane receptor protein serine/threonine kinase signaling pathway	0.0038836875526860764	5	201
transition metal ion transport	0.006447313668874345	4	104
response to heat	0.006447313668874345	4	103
transmembrane receptor protein serine/threonine kinase signaling pathway	0.017771986740521425	5	282
divalent inorganic cation transmembrane transporter activity	0.02046263791117344	4	142
cellular response to topologically incorrect protein	0.027142744866923398	4	154
bundle of His cell to Purkinje myocyte communication	0.0759723159449218	2	13
sequestering of metal ion	0.0759723159449218	2	13
cellular response to heat	0.09546897111500147	3	83

## Sheet: PREPUBERTAL - INTERANCTIONS
Gene 1	Gene 2	Weight	Network group (from GeneMANIA Application version : 3.6.0)
MT1B	MT1H	0.01676243	Co-expression
MT1E	HSPA6	0.012570939	Co-expression
MT1E	MT1H	0.014661675	Co-expression
MT1E	MT1B	0.013289453	Co-expression
MT1F	MT1A	0.008851486	Co-expression
MT1F	MT1H	0.019702654	Co-expression
MT1F	MT1B	0.01692948	Co-expression
MT1F	MT1E	0.014602309	Co-expression
MT1X	MT1H	0.01609253	Co-expression
MT1X	MT1B	0.012016008	Co-expression
MT1X	MT1E	0.00911141	Co-expression
MT1X	MT1F	0.016358558	Co-expression
MT2A	MT1H	0.016202006	Co-expression
MT2A	MT1B	0.014395672	Co-expression
MT2A	MT1E	0.013111808	Co-expression
MT2A	MT1F	0.016658306	Co-expression
MT1H	MT1A	0.02854192	Co-expression
MT1B	MT1A	0.030345531	Co-expression
MT1B	MT1H	0.030596266	Co-expression
MT1E	MT1A	0.024509465	Co-expression
MT1E	MT1H	0.024696998	Co-expression
MT1E	MT1B	0.027364388	Co-expression
MT1F	MT1A	0.01917383	Co-expression
MT1F	SLC30A2	0.016525542	Co-expression
MT1F	MT1H	0.01898728	Co-expression
MT1F	MT1B	0.02082692	Co-expression
MT1F	MT1E	0.018947229	Co-expression
MT1G	MT1A	0.02734715	Co-expression
MT1G	MT1H	0.027623208	Co-expression
MT1G	MT1B	0.029727418	Co-expression
MT1G	MT1E	0.02528839	Co-expression
MT1G	MT1F	0.021035602	Co-expression
MT1X	MT1A	0.030230965	Co-expression
MT1X	MT1H	0.030601496	Co-expression
MT1X	MT1B	0.03216811	Co-expression
MT1X	MT1E	0.026282601	Co-expression
MT1X	MT1F	0.019256307	Co-expression
MT1X	MT1G	0.028839244	Co-expression
MT2A	MT1A	0.021397997	Co-expression
MT2A	MT1H	0.021466501	Co-expression
MT2A	MT1B	0.023523869	Co-expression
MT2A	MT1G	0.018770847	Co-expression
MT2A	MT1X	0.023276761	Co-expression
SLC30A1	MT1E	0.026762312	Co-expression
APAF1	DNAJB4	0.016204245	Co-expression
MT1E	MT1H	0.03969292	Co-expression
MT1F	MT1H	0.027792804	Co-expression
MT1F	MT1E	0.03018042	Co-expression
MT1G	SLC30A2	0.019530276	Co-expression
MT1G	MT1H	0.033094164	Co-expression
MT1G	MT1E	0.030337935	Co-expression
MT1G	MT1F	0.02260755	Co-expression
MT1X	MT1H	0.038116056	Co-expression
MT1X	MT1E	0.042515803	Co-expression
MT1X	MT1F	0.025337337	Co-expression
MT1X	MT1G	0.026611501	Co-expression
MT2A	MT1H	0.03525432	Co-expression
MT2A	MT1E	0.043753892	Co-expression
MT2A	MT1F	0.022359004	Co-expression
MT2A	MT1X	0.041356206	Co-expression
MT1E	MT1H	0.019404009	Co-expression
MT1F	MT1E	0.018212026	Co-expression
MT1G	MT1H	0.017628597	Co-expression
MT1G	MT1E	0.01825587	Co-expression
MT1G	MT1F	0.015496804	Co-expression
MT1X	MT1H	0.011882819	Co-expression
MT1X	MT1E	0.018982904	Co-expression
MT1X	MT1F	0.016505351	Co-expression
MT1X	MT1G	0.013214333	Co-expression
XIAP	DSC2	0.0067668436	Co-expression
MT2A	MT1H	0.024551412	Co-expression
MT2A	MT1E	0.022377176	Co-expression
MT2A	MT1G	0.017626747	Co-expression
SLC30A1	MT1H	0.011959887	Co-expression
SLC30A1	MT1E	0.01723881	Co-expression
SLC30A1	MT1F	0.014966548	Co-expression
SLC30A1	MT1G	0.01311767	Co-expression
SLC30A1	MT1X	0.013761935	Co-expression
MT1H	MT1A	0.041993946	Co-expression
MT1B	MT1A	0.0403243	Co-expression
MT1B	MT1H	0.03874453	Co-expression
MT1E	MT1A	0.037637472	Co-expression
MT1E	MT1H	0.03601154	Co-expression
MT1E	MT1B	0.034275576	Co-expression
MT1F	MT1A	0.02901325	Co-expression
MT1F	MT1H	0.02624855	Co-expression
MT1F	MT1B	0.025330279	Co-expression
MT1F	MT1E	0.032054648	Co-expression
MT1G	MT1A	0.044722307	Co-expression
MT1G	MT1H	0.04319725	Co-expression
MT1G	MT1B	0.0425434	Co-expression
MT1G	MT1E	0.038906656	Co-expression
MT1G	MT1F	0.037515104	Co-expression
MT1X	MT1A	0.039477836	Co-expression
MT1X	MT1H	0.038512796	Co-expression
MT1X	MT1B	0.037695	Co-expression
MT1X	MT1E	0.035191014	Co-expression
MT1X	MT1F	0.02526446	Co-expression
MT1X	MT1G	0.04171834	Co-expression
HSPA1A	HSPA6	0.016195338	Co-expression
HSPA1A	HSPA8	0.025295986	Co-expression
DNAJB4	HSPA6	0.011779375	Co-expression
DNAJB4	HSPA8	0.024087444	Co-expression
MT2A	MT1A	0.036148403	Co-expression
MT2A	MT1H	0.033850487	Co-expression
MT2A	MT1B	0.03757737	Co-expression
MT2A	MT1E	0.033945214	Co-expression
MT2A	MT1F	0.024936073	Co-expression
MT2A	MT1G	0.03859754	Co-expression
MT2A	MT1X	0.0351209	Co-expression
SLC30A1	SLC30A10	0.011980917	Co-expression
GDF9	BMP15	0.0029175512	Co-expression
GDF9	DSC1	0.0043444755	Co-expression
MT1E	MT1H	0.02287721	Co-expression
MT1F	MT1H	0.015559795	Co-expression
MT1F	MT1E	0.015162742	Co-expression
MT1G	MT1H	0.018524228	Co-expression
MT1G	MT1E	0.017207023	Co-expression
MT1G	MT1F	0.016769622	Co-expression
MT1X	MT1H	0.021815835	Co-expression
MT1X	MT1E	0.022134954	Co-expression
MT1X	MT1F	0.015649738	Co-expression
MT1X	MT1G	0.018570561	Co-expression
DSC2	DSG2	0.01389203	Co-expression
MT2A	MT1H	0.023708047	Co-expression
MT2A	MT1E	0.024678616	Co-expression
MT2A	MT1F	0.01563539	Co-expression
MT2A	MT1G	0.017940952	Co-expression
MT2A	MT1X	0.024208535	Co-expression
MT1H	MT1A	0.020366186	Co-expression
MT1B	MT1A	0.016800882	Co-expression
MT1B	MT1H	0.01718263	Co-expression
MT1E	MT1A	0.024888013	Co-expression
MT1E	MT1H	0.023312824	Co-expression
MT1E	MT1B	0.02108932	Co-expression
MT1F	MT1A	0.027719928	Co-expression
MT1F	MT1H	0.02196343	Co-expression
MT1F	MT1B	0.017795391	Co-expression
MT1F	MT1E	0.026260272	Co-expression
MT1G	MT1A	0.01767568	Co-expression
MT1G	MT1H	0.017194929	Co-expression
MT1G	MT1B	0.016318081	Co-expression
MT1G	MT1E	0.017844427	Co-expression
MT1G	MT1F	0.017091554	Co-expression
MT1X	MT1A	0.020432565	Co-expression
MT1X	MT1H	0.01738476	Co-expression
MT1X	MT1B	0.014104596	Co-expression
MT1X	MT1E	0.023146104	Co-expression
MT1X	MT1F	0.01747275	Co-expression
MT2A	MT1A	0.020569397	Co-expression
MT2A	MT1H	0.021468306	Co-expression
MT2A	MT1B	0.019740636	Co-expression
MT2A	MT1E	0.021807486	Co-expression
MT2A	MT1F	0.021973208	Co-expression
MT2A	MT1G	0.018339397	Co-expression
MT1H	MT1A	0.05531992	Co-expression
MT1B	MT1A	0.056323703	Co-expression
MT1B	MT1H	0.059579775	Co-expression
MT1E	MT1A	0.05559596	Co-expression
MT1E	MT1H	0.053694382	Co-expression
MT1E	MT1B	0.060463022	Co-expression
MT1F	MT1A	0.05597153	Co-expression
MT1F	MT1H	0.059490714	Co-expression
MT1F	MT1B	0.058255747	Co-expression
MT1F	MT1E	0.052527376	Co-expression
MT1G	MT1A	0.040487267	Co-expression
MT1G	MT1H	0.05089238	Co-expression
MT1G	MT1B	0.041396223	Co-expression
MT1G	MT1E	0.034575682	Co-expression
MT1G	MT1F	0.0433245	Co-expression
MT1X	MT1A	0.036647487	Co-expression
MT1X	MT1H	0.027585968	Co-expression
MT1X	MT1B	0.028478358	Co-expression
MT1X	MT1E	0.031699143	Co-expression
MT1X	MT1F	0.029393094	Co-expression
MT1X	MT1G	0.014546598	Co-expression
DNAJB4	XIAP	0.024626158	Co-expression
MT2A	MT1A	0.025625689	Co-expression
MT2A	MT1H	0.025831167	Co-expression
MT2A	MT1B	0.02810621	Co-expression
MT2A	MT1E	0.027602963	Co-expression
MT2A	MT1F	0.023894556	Co-expression
MT2A	MT1X	0.014687574	Co-expression
APAF1	SLC30A3	0.0031873628	Co-expression
MT1H	MT1A	0.04789967	Co-expression
MT1B	MT1A	0.036404643	Co-expression
MT1B	MT1H	0.037735768	Co-expression
MT1E	MT1A	0.03222999	Co-expression
MT1E	MT1H	0.03479092	Co-expression
MT1E	MT1B	0.028594708	Co-expression
MT1F	MT1A	0.055093784	Co-expression
MT1F	MT1H	0.04942201	Co-expression
MT1F	MT1B	0.0381854	Co-expression
MT1F	MT1E	0.03500949	Co-expression
MT1G	MT1A	0.050590478	Co-expression
MT1G	MT1H	0.04878821	Co-expression
MT1G	MT1B	0.03082561	Co-expression
MT1G	MT1E	0.030651558	Co-expression
MT1G	MT1F	0.045749377	Co-expression
MT1X	MT1A	0.04583184	Co-expression
MT1X	MT1H	0.046881486	Co-expression
MT1X	MT1B	0.033615977	Co-expression
MT1X	MT1E	0.033646986	Co-expression
MT1X	MT1F	0.04859956	Co-expression
MT1X	MT1G	0.0417764	Co-expression
MT2A	MT1H	0.00846665	Co-expression
MT2A	MT1B	0.009195565	Co-expression
MT2A	MT1E	0.008822122	Co-expression
MT2A	MT1F	0.007679573	Co-expression
MT2A	MT1X	0.008421667	Co-expression
DSC1	SLC30A2	0.013374998	Co-expression
MT1E	MT1H	0.028021917	Co-expression
MT1F	MT1H	0.023248063	Co-expression
MT1F	MT1E	0.027301446	Co-expression
MT1G	MT1H	0.03095279	Co-expression
MT1G	MT1E	0.03723422	Co-expression
MT1G	MT1F	0.030751627	Co-expression
MT1X	MT1H	0.027082684	Co-expression
MT1X	MT1E	0.03262494	Co-expression
MT1X	MT1F	0.0276913	Co-expression
MT1X	MT1G	0.0352448	Co-expression
SLC30A3	BMP15	0.0018597416	Co-expression
XIAP	DSC2	0.022449007	Co-expression
MT2A	MT1H	0.031976286	Co-expression
MT2A	MT1E	0.038312666	Co-expression
MT2A	MT1F	0.031338673	Co-expression
MT2A	MT1G	0.041805893	Co-expression
MT2A	MT1X	0.037934728	Co-expression
MT1H	MT1A	0.03577203	Co-expression
MT1B	MT1A	0.03655908	Co-expression
MT1B	MT1H	0.035889905	Co-expression
MT1E	MT1A	0.031716578	Co-expression
MT1E	MT1H	0.030747108	Co-expression
MT1E	MT1B	0.031579316	Co-expression
MT1G	MT1A	0.036319733	Co-expression
MT1G	MT1H	0.035464518	Co-expression
MT1G	MT1B	0.035927553	Co-expression
MT1G	MT1E	0.031178584	Co-expression
MT1G	MT1F	0.017473489	Co-expression
MT1X	MT1A	0.03556611	Co-expression
MT1X	MT1H	0.03489739	Co-expression
MT1X	MT1B	0.03577744	Co-expression
MT1X	MT1E	0.030548364	Co-expression
MT1X	MT1G	0.035341613	Co-expression
HSPA1A	HSPA6	0.018580947	Co-expression
XIAP	DSG2	0.0068315975	Co-expression
DNAJB4	HSPA1A	0.021132609	Co-expression
MT2A	MT1A	0.03462616	Co-expression
MT2A	MT1H	0.03413633	Co-expression
MT2A	MT1B	0.03555189	Co-expression
MT2A	MT1E	0.028109625	Co-expression
MT2A	MT1G	0.03352945	Co-expression
MT2A	MT1X	0.034150835	Co-expression
SLC30A1	MT1F	0.014117291	Co-expression
MT1G	MT1H	0.039793033	Co-expression
MT1X	MT1H	0.017028052	Co-expression
MT1X	MT1G	0.021944407	Co-expression
MT1G	MT1H	0.008814949	Co-expression
MT1X	MT1H	0.0068035447	Co-expression
MT1X	MT1G	0.006851611	Co-expression
MT1E	MT1H	0.024098871	Co-expression
MT1F	MT1H	0.017231852	Co-expression
MT1F	MT1E	0.035937477	Co-expression
MT1G	MT1H	0.021361921	Co-expression
MT1G	MT1E	0.029573139	Co-expression
MT1G	MT1F	0.021840923	Co-expression
MT1X	MT1H	0.026526362	Co-expression
MT1X	MT1E	0.038823146	Co-expression
MT1X	MT1F	0.03202558	Co-expression
MT1X	MT1G	0.03391206	Co-expression
DSC2	DSG2	0.0031463725	Co-expression
DSC2	DSC1	0.0050247083	Co-expression
MT2A	MT1H	0.017455136	Co-expression
MT2A	MT1E	0.022924785	Co-expression
MT2A	MT1G	0.018627733	Co-expression
MT2A	MT1X	0.021165872	Co-expression
MT1H	MT1A	0.02127589	Co-expression
MT1B	MT1A	0.0172949	Co-expression
MT1B	MT1H	0.0188692	Co-expression
MT1E	MT1A	0.020073097	Co-expression
MT1E	MT1H	0.021940881	Co-expression
MT1E	MT1B	0.020246256	Co-expression
MT1F	MT1A	0.020214595	Co-expression
MT1F	MT1H	0.022690332	Co-expression
MT1F	MT1B	0.01842895	Co-expression
MT1F	MT1E	0.021295588	Co-expression
MT1X	MT1A	0.020696543	Co-expression
MT1X	MT1H	0.023246234	Co-expression
MT1X	MT1B	0.019331543	Co-expression
MT1X	MT1E	0.022004278	Co-expression
MT1X	MT1F	0.021590509	Co-expression
MT1G	MT1H	0.015642602	Co-expression
MT1X	MT1H	0.013175027	Co-expression
MT1X	MT1G	0.01631246	Co-expression
MT1G	MT1H	0.010700333	Co-localization
DSC2	DSG2	0.0131773995	Co-localization
SLC30A1	MT1H	0.011192461	Co-localization
SLC30A1	MT1G	0.01103071	Co-localization
CASP3	XIAP	0.050293453	Co-localization
SLC30A3	MT1H	0.02162316	Genetic Interactions
XIAP	MT1G	0.0025441365	Genetic Interactions
SLC30A1	BMP15	0.001363276	Genetic Interactions
SLC30A1	MT1E	0.001784681	Genetic Interactions
APAF1	SLC30A10	0.0008490354	Genetic Interactions
STUB1	HSPA6	0.14550097	Pathway
STUB1	HSPA8	0.061513834	Pathway
CASP3	DSG2	0.116512835	Pathway
CASP3	XIAP	0.010560773	Pathway
APAF1	XIAP	0.046509333	Pathway
APAF1	CASP3	0.01510013	Pathway
CASP3	XIAP	0.11840521	Pathway
HSPA1A	HSPA8	0.07243324	Physical Interactions
XIAP	DSG2	0.1300839	Physical Interactions
CASP3	DSG2	0.062098768	Physical Interactions
CASP3	XIAP	0.020591708	Physical Interactions
APAF1	DSG2	0.11017407	Physical Interactions
APAF1	CASP3	0.017440068	Physical Interactions
HSPA1A	HSPA8	0.07243324	Physical Interactions
XIAP	DSG2	0.1300839	Physical Interactions
CASP3	DSG2	0.062098768	Physical Interactions
CASP3	XIAP	0.020591708	Physical Interactions
APAF1	DSG2	0.11017407	Physical Interactions
APAF1	CASP3	0.017440068	Physical Interactions
HSPA8	HSPA6	0.1285378	Physical Interactions
STUB1	HSPA8	0.06788265	Physical Interactions
HSPA8	HSPA6	0.3173663	Physical Interactions
HSPA1A	HSPA6	0.2779409	Physical Interactions
HSPA1A	HSPA8	0.08355284	Physical Interactions
STUB1	HSPA8	0.01791307	Physical Interactions
STUB1	HSPA1A	0.015073945	Physical Interactions
DNAJB4	HSPA6	0.27412707	Physical Interactions
DNAJB4	HSPA1A	0.11087916	Physical Interactions
STUB1	HSPA8	0.66306245	Physical Interactions
CASP3	XIAP	0.07210417	Physical Interactions
DNAJB4	HSPA8	0.04319394	Physical Interactions
HSPA1A	HSPA6	0.16023254	Physical Interactions
HSPA1A	HSPA8	0.032269772	Physical Interactions
STUB1	HSPA1A	0.0591695	Physical Interactions
HSPA1A	HSPA8	0.0126990825	Physical Interactions
STUB1	HSPA8	0.019676032	Physical Interactions
SLC30A3	SLC30A2	0.24069123	Physical Interactions
SLC30A10	SLC30A2	0.24530147	Physical Interactions
SLC30A10	SLC30A3	0.24530147	Physical Interactions
SLC30A1	SLC30A2	0.30437165	Physical Interactions
SLC30A1	SLC30A3	0.30437165	Physical Interactions
DSC1	DSG2	0.17259571	Physical Interactions
HSPA1A	HSPA8	0.0021029084	Physical Interactions
SLC30A3	SLC30A2	0.32281157	Physical Interactions
SLC30A10	SLC30A2	0.33406398	Physical Interactions
SLC30A10	SLC30A3	0.21236633	Physical Interactions
DSC2	DSG2	0.25247252	Physical Interactions
XIAP	HSPA1A	0.003559192	Physical Interactions
STUB1	HSPA8	0.0010213623	Physical Interactions
STUB1	HSPA1A	0.0015387519	Physical Interactions
STUB1	XIAP	0.0017286651	Physical Interactions
DNAJB4	HSPA6	0.07140263	Physical Interactions
DNAJB4	HSPA1A	0.022776341	Physical Interactions
CASP3	XIAP	0.0057141404	Physical Interactions
APAF1	XIAP	0.01564536	Physical Interactions
CASP3	XIAP	0.018467866	Physical Interactions
APAF1	XIAP	0.17669241	Physical Interactions
DSC1	DSG2	1	Physical Interactions
CASP3	XIAP	0.1326797	Physical Interactions
STUB1	HSPA6	0.6225299	Physical Interactions
STUB1	HSPA8	0.08506922	Physical Interactions
CASP3	XIAP	0.054667704	Physical Interactions
APAF1	HSPA1A	0.11439633	Physical Interactions
APAF1	CASP3	0.12234978	Physical Interactions
STUB1	HSPA8	0.25157076	Physical Interactions
CASP3	XIAP	0.032411795	Physical Interactions
CASP3	XIAP	0.07349216	Physical Interactions
CASP3	XIAP	0.497679	Physical Interactions
CASP3	XIAP	0.08414408	Physical Interactions
STUB1	HSPA6	0.078939155	Physical Interactions
STUB1	HSPA8	0.01782089	Physical Interactions
STUB1	HSPA1A	0.029877057	Physical Interactions
DNAJB4	HSPA6	0.39808416	Physical Interactions
APAF1	HSPA1A	0.020424258	Physical Interactions
APAF1	CASP3	0.14250255	Physical Interactions
STUB1	HSPA1A	0.13759114	Physical Interactions
APAF1	HSPA1A	0.12174546	Physical Interactions
STUB1	HSPA1A	0.017996332	Physical Interactions
CASP3	XIAP	0.019004188	Physical Interactions
APAF1	HSPA1A	0.027147355	Physical Interactions
APAF1	CASP3	0.02649325	Physical Interactions
DNAJB4	HSPA6	0.23596595	Physical Interactions
DSC1	DSG2	0.047714774	Physical Interactions
HSPA8	HSPA6	0.0019499538	Physical Interactions
HSPA1A	HSPA6	0.004193232	Physical Interactions
HSPA1A	HSPA8	0.00095552136	Physical Interactions
SLC30A3	SLC30A2	0.14295086	Physical Interactions
SLC30A10	SLC30A2	0.17133915	Physical Interactions
SLC30A10	SLC30A3	0.29924884	Physical Interactions
DSC2	DSG2	0.069461115	Physical Interactions
XIAP	HSPA1A	0.0035871456	Physical Interactions
STUB1	HSPA8	0.0008446379	Physical Interactions
STUB1	HSPA1A	0.0018163314	Physical Interactions
STUB1	XIAP	0.0031708756	Physical Interactions
DNAJB4	HSPA6	0.0141261015	Physical Interactions
DNAJB4	HSPA8	0.003218947	Physical Interactions
DNAJB4	HSPA1A	0.0069221077	Physical Interactions
CASP3	XIAP	0.008491061	Physical Interactions
DSC1	DSG2	0.28617534	Predicted
GDF9	BMP15	0.851885	Predicted
MT1E	MT1H	0.18305619	Predicted
MT1F	MT1H	0.15586922	Predicted
MT1F	MT1E	0.18305619	Predicted
HSPA8	HSPA6	0.01983691	Predicted
MT1G	MT1H	0.15586922	Predicted
MT1G	MT1E	0.18305619	Predicted
MT1G	MT1F	0.15586922	Predicted
MT1X	MT1H	0.15586922	Predicted
MT1X	MT1E	0.18305619	Predicted
MT1X	MT1F	0.15586922	Predicted
MT1X	MT1G	0.15586922	Predicted
DSC2	DSG2	0.36627823	Predicted
DNAJB4	HSPA6	0.12898897	Predicted
DNAJB4	HSPA8	0.04097219	Predicted
MT2A	MT1H	0.18305619	Predicted
MT2A	MT1E	0.21498518	Predicted
MT2A	MT1F	0.18305619	Predicted
MT2A	MT1G	0.18305619	Predicted
MT2A	MT1X	0.18305619	Predicted
STUB1	HSPA8	0.4190237	Predicted
STUB1	HSPA8	0.028829424	Predicted
DNAJB4	HSPA1A	0.15407889	Predicted
DSC1	DSG2	0.022302862	Shared protein domains
GDF9	BMP15	0.022144618	Shared protein domains
MT1H	MT1A	0.09516847	Shared protein domains
MT1B	MT1A	0.09516847	Shared protein domains
MT1B	MT1H	0.09516847	Shared protein domains
MT1E	MT1A	0.09516847	Shared protein domains
MT1E	MT1H	0.09516847	Shared protein domains
MT1E	MT1B	0.09516847	Shared protein domains
MT1F	MT1A	0.09516847	Shared protein domains
MT1F	MT1H	0.09516847	Shared protein domains
MT1F	MT1B	0.09516847	Shared protein domains
MT1F	MT1E	0.09516847	Shared protein domains
HSPA8	HSPA6	0.05007297	Shared protein domains
MT1G	MT1A	0.09516847	Shared protein domains
MT1G	MT1H	0.09516847	Shared protein domains
MT1G	MT1B	0.09516847	Shared protein domains
MT1G	MT1E	0.09516847	Shared protein domains
MT1G	MT1F	0.09516847	Shared protein domains
MT1X	MT1A	0.09516847	Shared protein domains
MT1X	MT1H	0.09516847	Shared protein domains
MT1X	MT1B	0.09516847	Shared protein domains
MT1X	MT1E	0.09516847	Shared protein domains
MT1X	MT1F	0.09516847	Shared protein domains
MT1X	MT1G	0.09516847	Shared protein domains
HSPA1A	HSPA6	0.05007297	Shared protein domains
HSPA1A	HSPA8	0.05007297	Shared protein domains
SLC30A3	SLC30A2	0.12740438	Shared protein domains
SLC30A10	SLC30A2	0.09415145	Shared protein domains
SLC30A10	SLC30A3	0.09415145	Shared protein domains
DSC2	DSG2	0.022301294	Shared protein domains
DSC2	DSC1	0.033118393	Shared protein domains
MT2A	MT1A	0.09516847	Shared protein domains
MT2A	MT1H	0.09516847	Shared protein domains
MT2A	MT1B	0.09516847	Shared protein domains
MT2A	MT1E	0.09516847	Shared protein domains
MT2A	MT1F	0.09516847	Shared protein domains
MT2A	MT1G	0.09516847	Shared protein domains
MT2A	MT1X	0.09516847	Shared protein domains
SLC30A1	SLC30A2	0.12740438	Shared protein domains
SLC30A1	SLC30A3	0.12740438	Shared protein domains
SLC30A1	SLC30A10	0.09415145	Shared protein domains
DSC1	DSG2	0.014687126	Shared protein domains
GDF9	BMP15	0.031773105	Shared protein domains
MT1H	MT1A	0.09090909	Shared protein domains
MT1B	MT1A	0.09090909	Shared protein domains
MT1B	MT1H	0.09090909	Shared protein domains
MT1E	MT1A	0.09090909	Shared protein domains
MT1E	MT1H	0.09090909	Shared protein domains
MT1E	MT1B	0.09090909	Shared protein domains
MT1F	MT1A	0.09090909	Shared protein domains
MT1F	MT1H	0.09090909	Shared protein domains
MT1F	MT1B	0.09090909	Shared protein domains
MT1F	MT1E	0.09090909	Shared protein domains
HSPA8	HSPA6	0.07692308	Shared protein domains
MT1G	MT1A	0.09090909	Shared protein domains
MT1G	MT1H	0.09090909	Shared protein domains
MT1G	MT1B	0.09090909	Shared protein domains
MT1G	MT1E	0.09090909	Shared protein domains
MT1G	MT1F	0.09090909	Shared protein domains
MT1X	MT1A	0.09090909	Shared protein domains
MT1X	MT1H	0.09090909	Shared protein domains
MT1X	MT1B	0.09090909	Shared protein domains
MT1X	MT1E	0.09090909	Shared protein domains
MT1X	MT1F	0.09090909	Shared protein domains
MT1X	MT1G	0.09090909	Shared protein domains
HSPA1A	HSPA6	0.07692308	Shared protein domains
HSPA1A	HSPA8	0.07692308	Shared protein domains
SLC30A3	SLC30A2	0.11111111	Shared protein domains
SLC30A10	SLC30A2	0.11111111	Shared protein domains
SLC30A10	SLC30A3	0.11111111	Shared protein domains
DSC2	DSG2	0.014687126	Shared protein domains
DSC2	DSC1	0.044866882	Shared protein domains
MT2A	MT1A	0.09090909	Shared protein domains
MT2A	MT1H	0.09090909	Shared protein domains
MT2A	MT1B	0.09090909	Shared protein domains
MT2A	MT1E	0.09090909	Shared protein domains
MT2A	MT1F	0.09090909	Shared protein domains
MT2A	MT1G	0.09090909	Shared protein domains
MT2A	MT1X	0.09090909	Shared protein domains
SLC30A1	SLC30A2	0.11111111	Shared protein domains
SLC30A1	SLC30A3	0.11111111	Shared protein domains
SLC30A1	SLC30A10	0.11111111	Shared protein domains
